# Supplementary material for: Effectiveness of Nootropics in Combination with Cholinesterase Inhibitors on Cognitive Function in Mild-to-Moderate Dementia: A Study Using Real-world Data
Source: Research Square preprint supplement (doi:10.21203/rs.3.rs-1317818/v2), 2022-03-22
Supplement: Supplementary file 1 [file a1dc4c8fe53c42d11643cdae.docx]

**Supplementary Table 1.** Comparison of the distribution of the three types of cholinesterase inhibitor in the cholinesterase inhibitor only group and the cholinesterase inhibitor and nootropics combination group

|  | ChEI only  (n = 410) | ChEI + nootropics  (n = 173) | *χ2* | *p* value |
| --- | --- | --- | --- | --- |
| Donepezil | 353 (86.1) | 153 (88.4) | 0.582 | 0.446 |
| Rivastigmine | 93 (22.7) | 33 (19.1) | 0.935 | 0.334 |
| Galantamine | 28 (6.8) | 19 (11.0) | 2.832 | 0.092 |

Values are presented as number (%).

ChEI, cholinesterase inhibitor.

If subjects were prescribed multiple types of cholinesterase inhibitor, each of them was separately included in each types of cholinesterase inhibitor.
